# Supplementary material for: Treatment with Non-Steroidal Anti-Inflammatory Drugs (NSAIDs) Does Not Affect Outcome in Patients with Acute Myocarditis or Myopericarditis
Source: MDPI journal article supplement (doi:10.3390/jcdd9020032), 2022-01-19
Supplement: s1 [file s1]

# **Treatment with non-steroidal anti-inflammatory drugs (NSAID) does not affect outcome in patients with acute myocarditis or myopericarditis.**

- *Supplementary materials* –

Moritz Mirna<sup>1</sup>, Lukas Schmutzler<sup>1</sup>, Albert Topf<sup>1</sup>, Elke Boxhammer<sup>1</sup>, Brigitte Sipos<sup>1</sup>, Uta C. Hoppe<sup>1</sup>, Michael Lichtenauer<sup>1</sup>

<sup>1</sup> Department of Internal Medicine II, Division of Cardiology, Paracelsus Medical University of Salzburg, Austria

## Correspondence:

Moritz Mirna, MD, PhD, FESC

Department of Internal Medicine II  
Division of Cardiology  
Universitätsklinikum der Paracelsus Medizinischen Universität  
Müllner Hauptstraße 48  
5020 Salzburg  
Austria

email: [m.mirna@salk.at](mailto:m.mirna@salk.at)

Telephone: +43 (0) 57255 - 58340

ORCID iD: <https://orcid.org/0000-0001-5679-4872>

# Supplementary Figure S1

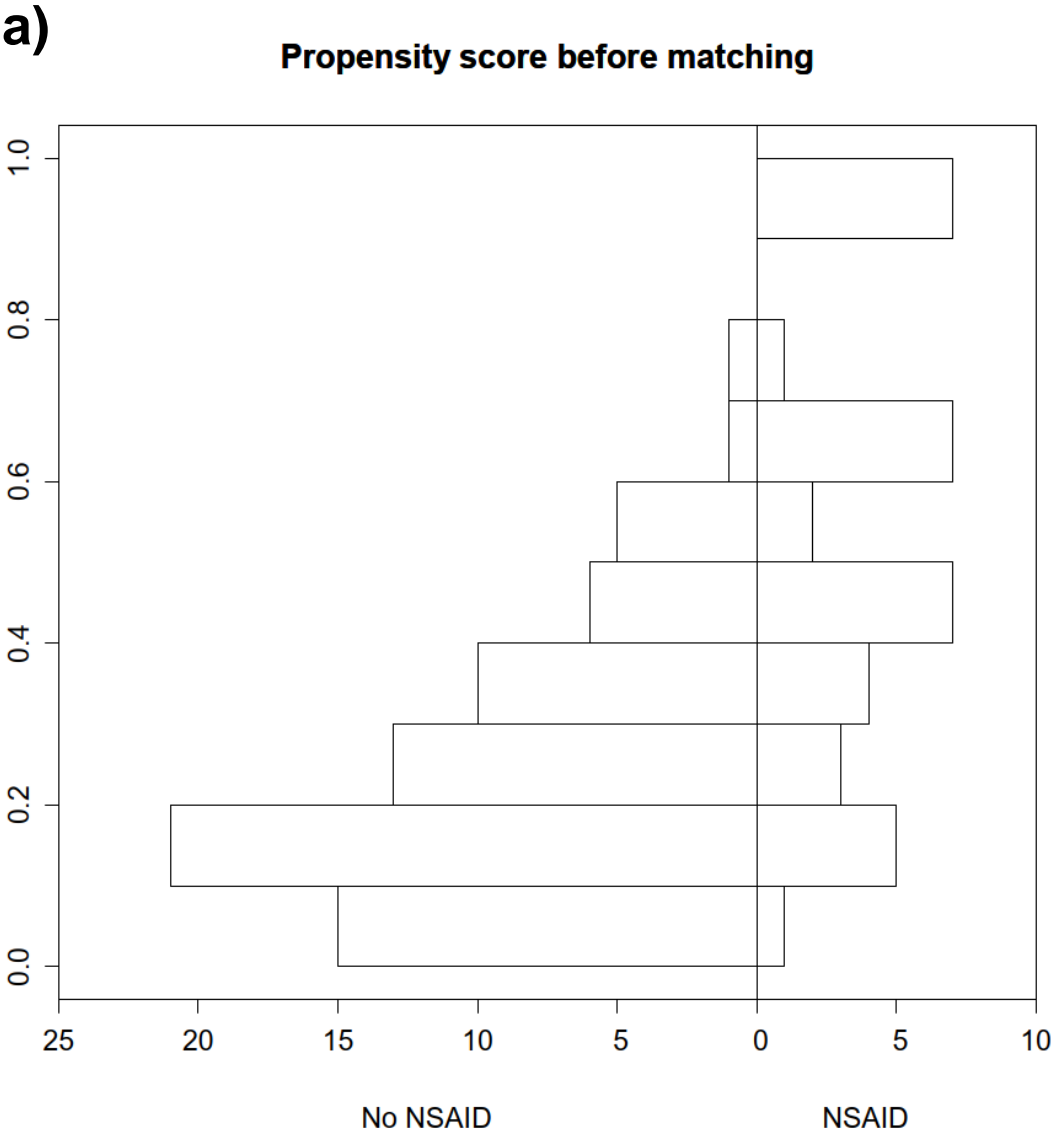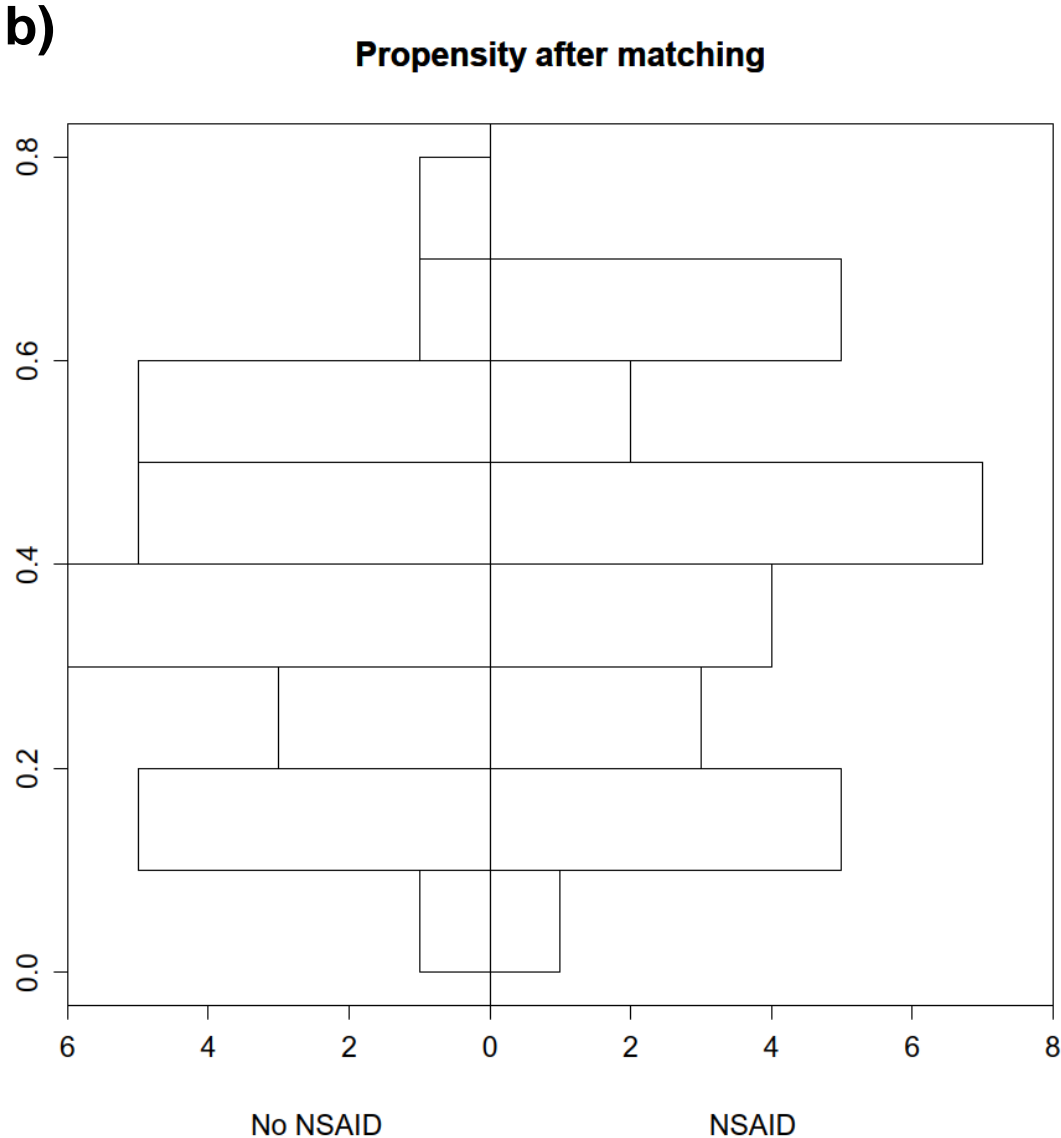

**Suppl. Figure S1:** Distribution of propensity scores **a)** before (n=114) and **b)** after propensity score matching (n= 54). *Abbreviations: NSAID= non-steroidal anti-inflammatory drug.*

# Supplementary Figure S2

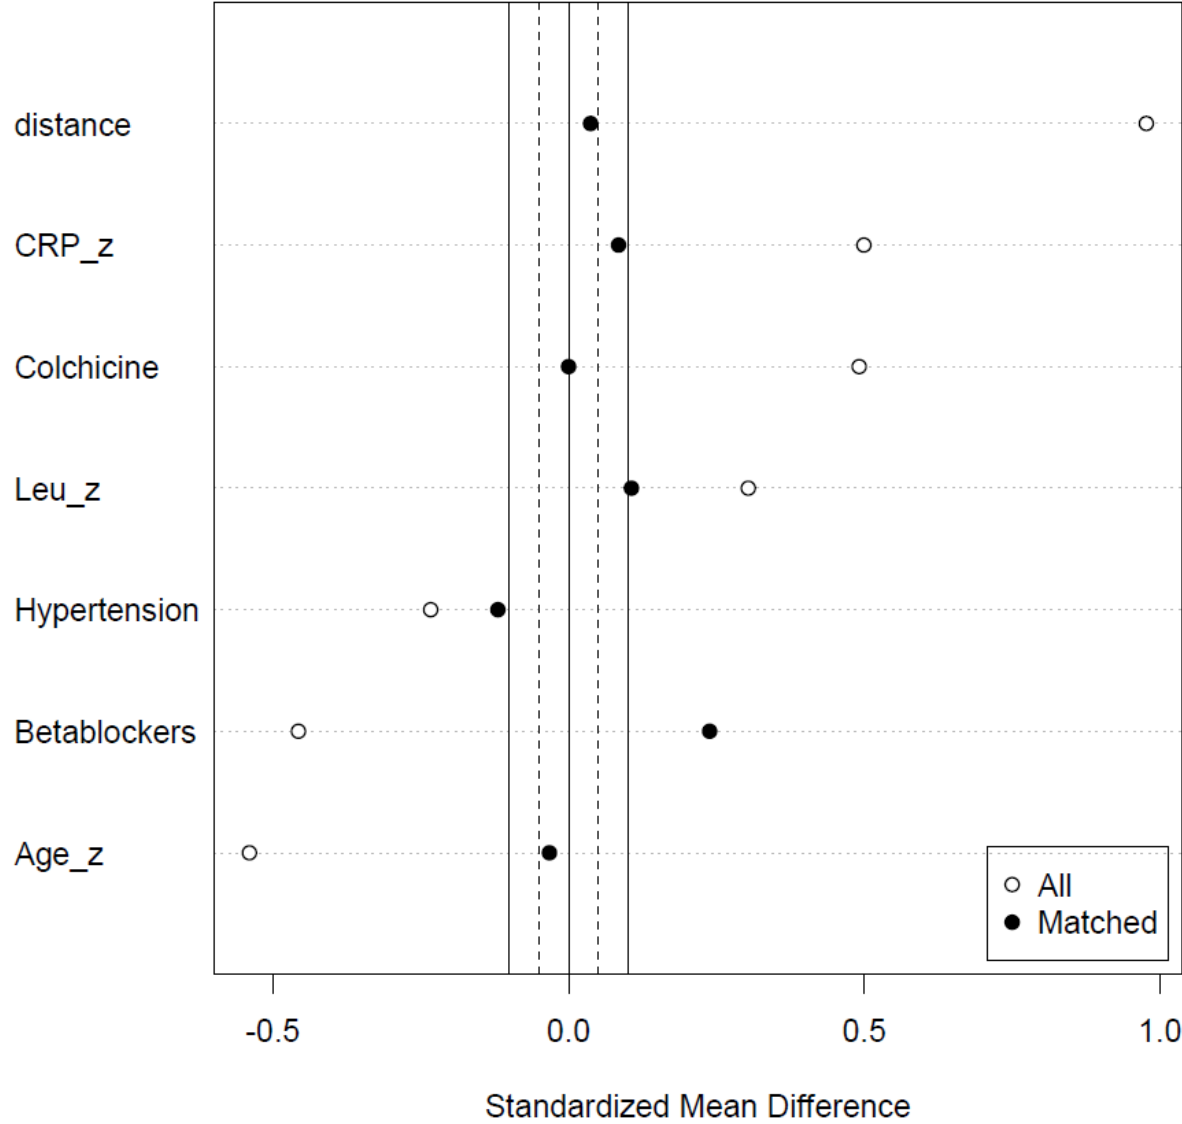

**Suppl. Figure S2:** Standardized mean differences of included covariates before and after propensity score matching. *Abbreviations: CRP\_z= calculated z-score of C-reactive protein, Leu\_z= calculated z-score of leukocyte count.*

# Supplementary Figure S3

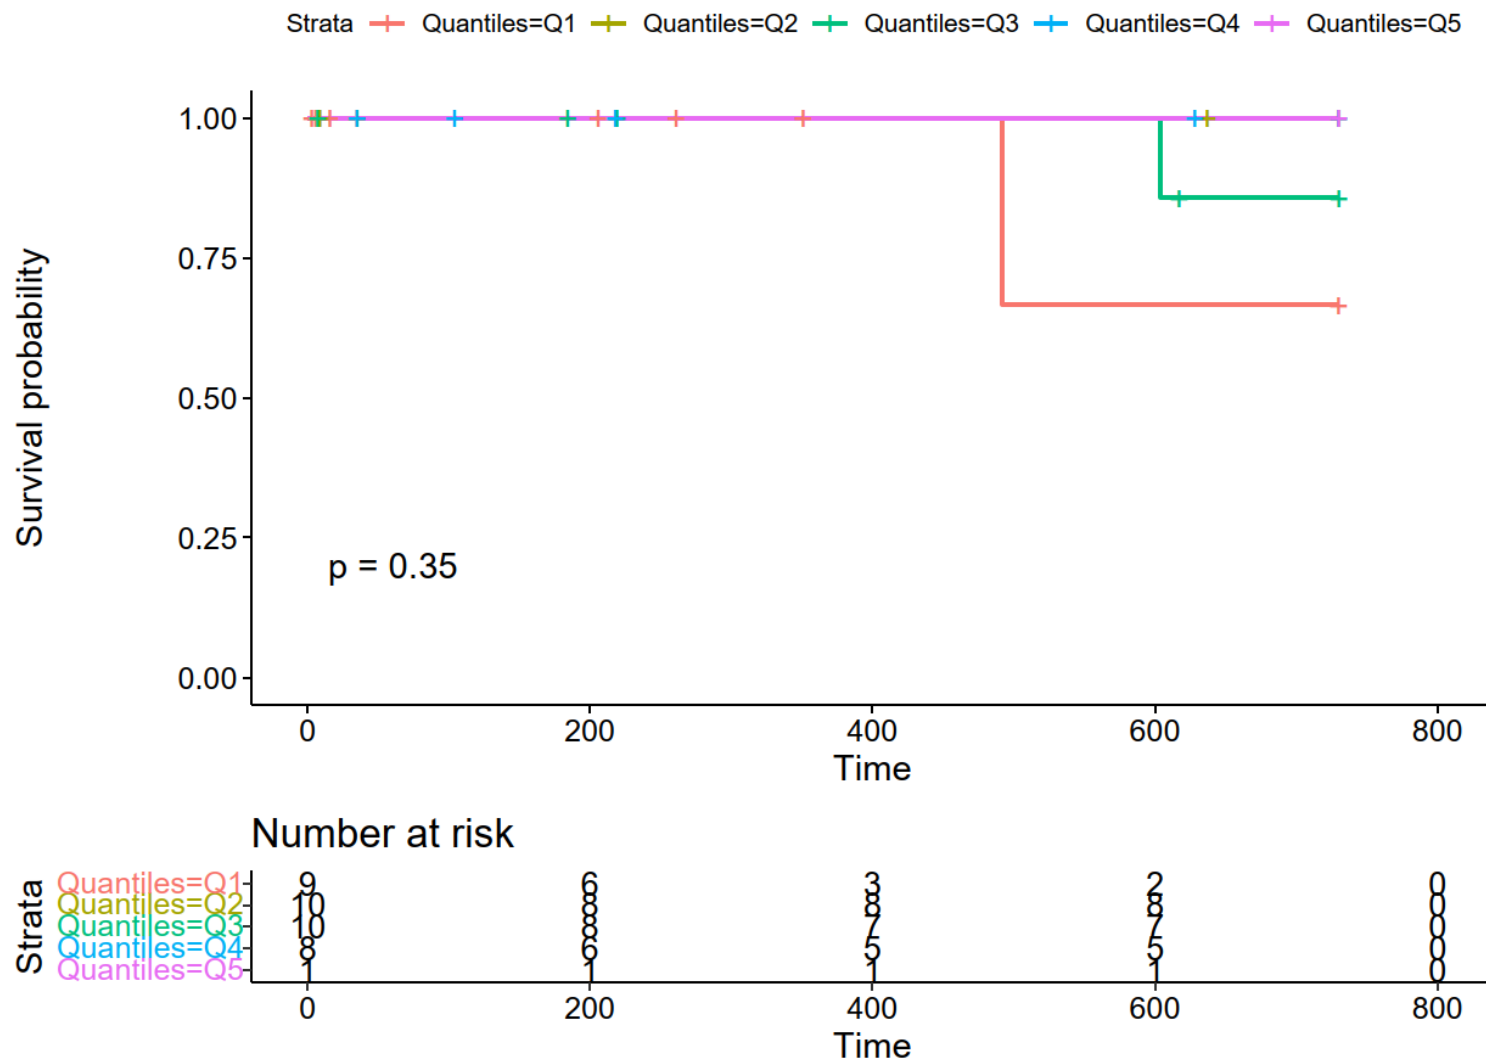

**Suppl. Figure S3:** Kaplan-Meier plots of all-cause mortality within 24 months of follow-up in patients treated with NSAID segregated by quantiles of C-reactive protein (CRP). Q0= <5% (<0.10 mg/dl), Q1= 5-25% (0.10-1.44 mg/dl), Q2= 25-50% (1.45-7.34 mg/dl), Q3= 50-75% (7.35-12.54 mg/dl), Q4= 75-95% (12.55-25.11 mg/dl), Q5= >95% (>25.11 mg/dl)
